# Supplementary material
Source: Springer Nature journal article supplement (https://www.springermedizin.de/resource/supplementary/12937_2012_556_MOESM5_ESM.pdf/25653540)

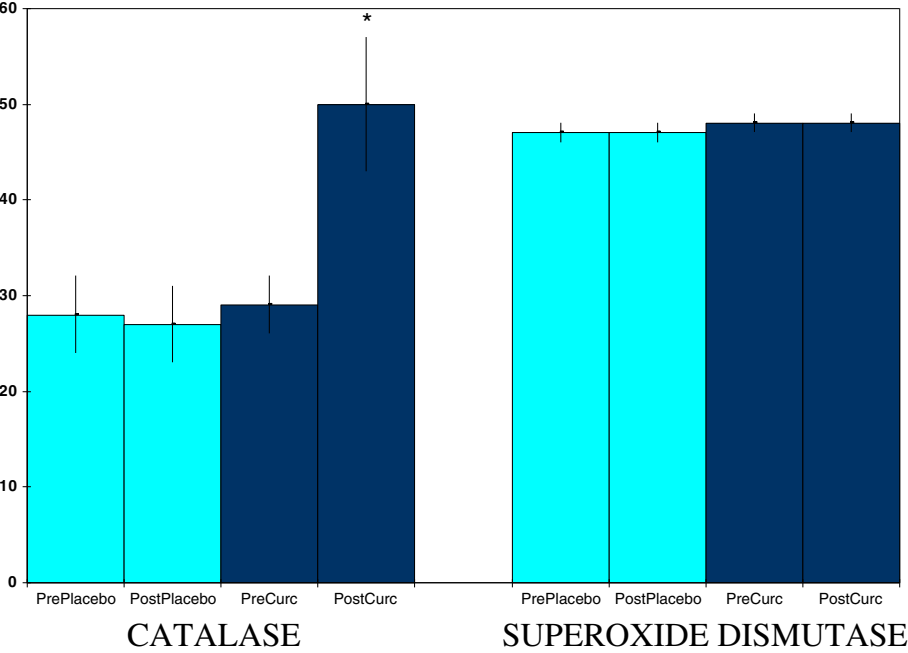

Supplement: MOESM5 [file 25653540]
